# Supplementary material for: Amplicon Sequencing of Colorectal Cancer: Variant Calling in Frozen and Formalin-Fixed Samples
Source: PLoS One. 2015 May 26;10(5):e0127146. doi: 10.1371/journal.pone.0127146 (PMC4444292; doi:10.1371/journal.pone.0127146)
Supplement: S4 Table — (XLSX) [file pone.0127146.s010.xlsx]

## Sheet: Blatt1
S4 Table. Patient sequencing statistics
Patient	Site	Tissue	Run	# Raw Reads	# Paired Reads Mapped	% Reads Mapped	Mean Depth	GC Content	Mean Sequence Quality	Forward Reads	Reverse Reads	Average
Pat01	Meta	FFPE	2	645789	620863	0.961402	2833.92	50	38	49.5413	49.6582	49.5997
Pat01	Meta	Frozen	1	1257762	982630	0.781253	4595.23	44	37	48.7837	49.1746	48.9791
Pat02	Meta	FFPE	2	451655	435504	0.96424	1956.98	49	38	49.5205	49.6296	49.5751
Pat03	Meta	FFPE	2	612864	590426	0.963388	2689.76	47	38	49.5674	49.6842	49.6258
Pat03	Meta	Frozen	1	1440255	1163200	0.807635	5484.75	45	37	48.7059	48.8976	48.8017
Pat04	Meta	FFPE	2	562570	540634	0.961008	2489.11	48	38	49.6009	49.6874	49.6442
Pat04	Meta	Frozen	1	1409073	1100273	0.780849	5141.92	48	37	48.5637	49.0019	48.7828
Pat04	Prim	FFPE	2	188969	181486	0.960401	817.013	50	38	49.5658	49.713	49.6394
Pat05	Meta	FFPE	2	653332	628019	0.961256	2891.89	46	38	49.5988	49.6928	49.6458
Pat05	Prim	FFPE	2	556749	535898	0.962549	2463.47	47	38	49.5705	49.6847	49.6276
Pat06	Meta	FFPE	2	255559	246188	0.963331	1140.1	44	38	49.6175	49.6877	49.6526
Pat08	Meta	FFPE	2	260749	250094	0.959137	1139.01	49	38	49.5645	49.6457	49.6051
Pat08	Meta	Frozen	1	981732	772459	0.786833	3611.08	45	37	49.1913	49.5612	49.3763
Pat09	Meta	FFPE	2	158733	152394	0.960065	697.877	51	38	49.5432	49.6361	49.5896
Pat09	Meta	Frozen	1	1014810	785921	0.774451	3710.36	45	37	49.2816	49.5025	49.3921
Pat10	Meta	FFPE	2	305632	294175	0.962514	1361.53	48	38	49.593	49.6778	49.6354
Pat10	Meta	Frozen	1	718550	550377	0.765955	2571.03	45	37	49.2685	49.6466	49.4575
Pat10	Prim	FFPE	2	214362	206381	0.962769	951.013	46	38	49.6669	49.7175	49.6922
Pat11	Meta	FFPE	2	476242	457389	0.960413	2110.78	48	38	49.5773	49.6657	49.6215
Pat11	Meta	Frozen	1	1265812	968459	0.765089	4484.13	45	37	48.7389	49.2107	48.9748
Pat11	Prim	FFPE	2	616049	592889	0.962406	2729.05	47	38	49.6098	49.6842	49.647
Pat12	Meta	FFPE	2	282072	271282	0.961747	1224.73	50	38	49.5055	49.6339	49.5697
Pat12	Meta	Frozen	2	810936	782837	0.96535	3753.93	45	38	49.4376	49.5036	49.4706
Pat13	Meta	FFPE	2	395055	379482	0.96058	1746.14	52	38	49.4875	49.6075	49.5475
Pat13	Meta	Frozen	1	1307754	1036000	0.792198	4881.88	45	37	48.8426	49.0285	48.9356
Pat13	Meta	Frozen	2	719162	693745	0.964657	3335.42	45	38	49.6233	49.6928	49.658
Pat14	Meta	FFPE	2	530387	511057	0.963555	2326	51	38	49.4797	49.6133	49.5465
Pat14	Meta	Frozen	1	1290856	985698	0.7636	4649.49	47	37	48.8082	49.1445	48.9763
Pat14	Prim	FFPE	2	268373	258752	0.964151	1198.46	49	38	49.5826	49.6824	49.6325
Pat15	Meta	Frozen	1	1323442	1058047	0.799466	4869.66	46	37	48.6141	49.062	48.838
Pat16	Meta	Frozen	2	587905	569098	0.96801	2726.9	45	38	49.5853	49.6822	49.6337
Pat17	Meta	Frozen	2	597435	576121	0.964324	2744.7	45	38	49.5769	49.6771	49.627
Pat18	Meta	Frozen	2	698874	675562	0.966643	3231.66	45	38	49.5953	49.6809	49.6381
